# Supplementary material for: Intranasal Immunization with Peptide-based Immunogenic Complex Enhances BCG Vaccine Efficacy in murine model of Tuberculosis
Source: JCI journal article supplement (doi:10.1172/jci.insight.145228), 2021-01-14
Supplement: sd1 [file 1]

1     **Supplementary Materials:**

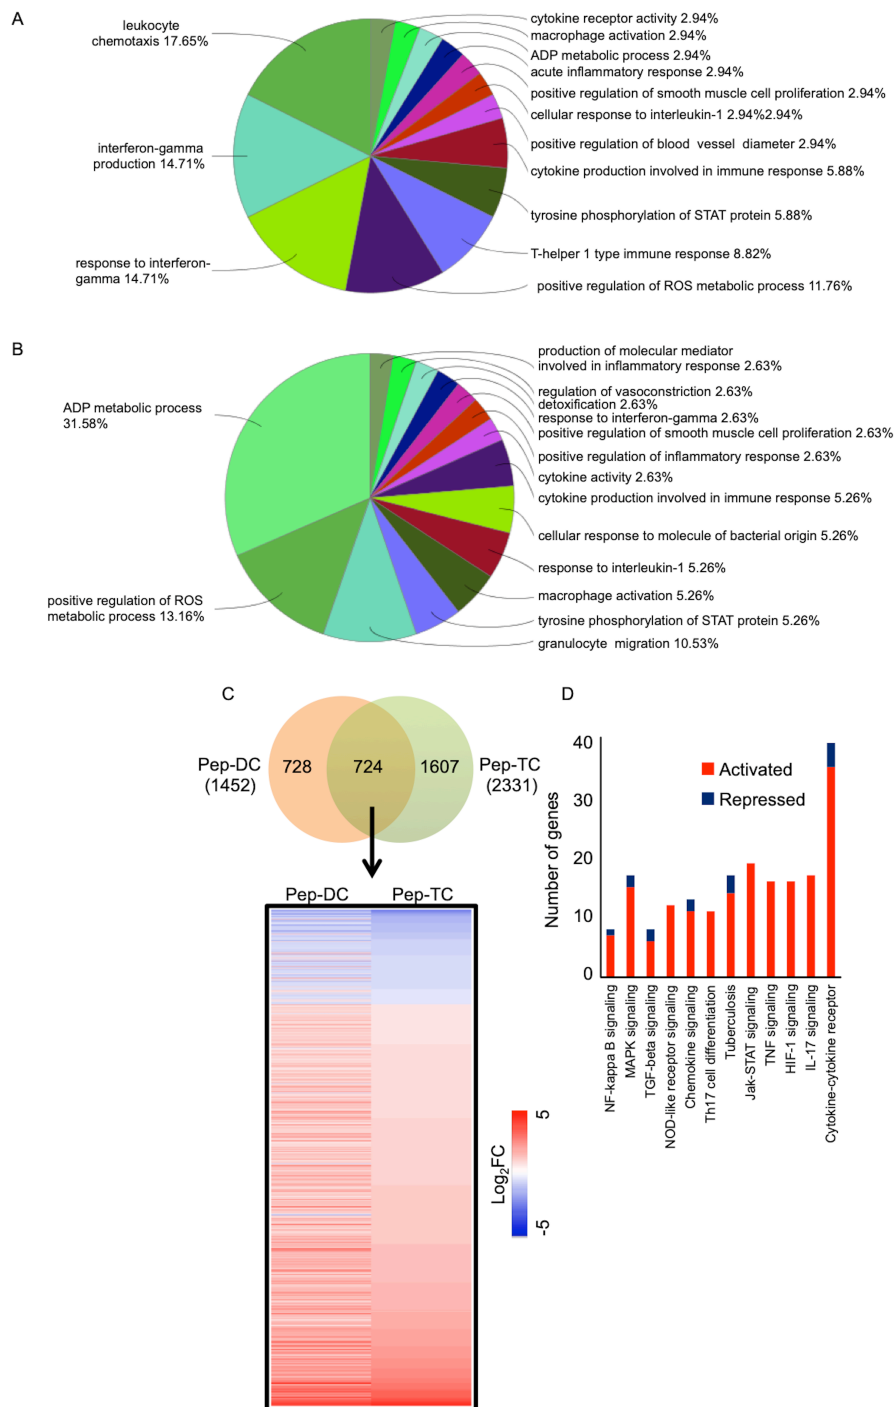

2

3     **Supplementary Figure 1: *M.tb* peptides induce upregulation of genes that confer**

4     **protection against TB in both DCs and T cells. (A)** Pie diagram indicating the GO

5     biological processes upregulated in DCs pulsed with peptide pool as compared to

6     unstimulated DCs. **(B)** Pie chart indicating the percentage of genes belonging to different GO

7     biological processes in stimulated T cells as compared to unstimulated T cells. **(C)** Heatmap

8     depicting the expression profile of the genes common between the DCs and T cells. **(D)**

9     KEGG pathway analysis of the shared genes representing the significantly affected pathways.

10     **Un-DC:** unstimulated DCs, **Pep-DC:** DCs pulsed with peptide pool, **Un-TC:** T cells co-

cultured with unstimulated DCs, **Pep-TC**: T cells co-cultured with DCs pulsed with peptide pool. RNAseq was performed once in triplicates (n=3).

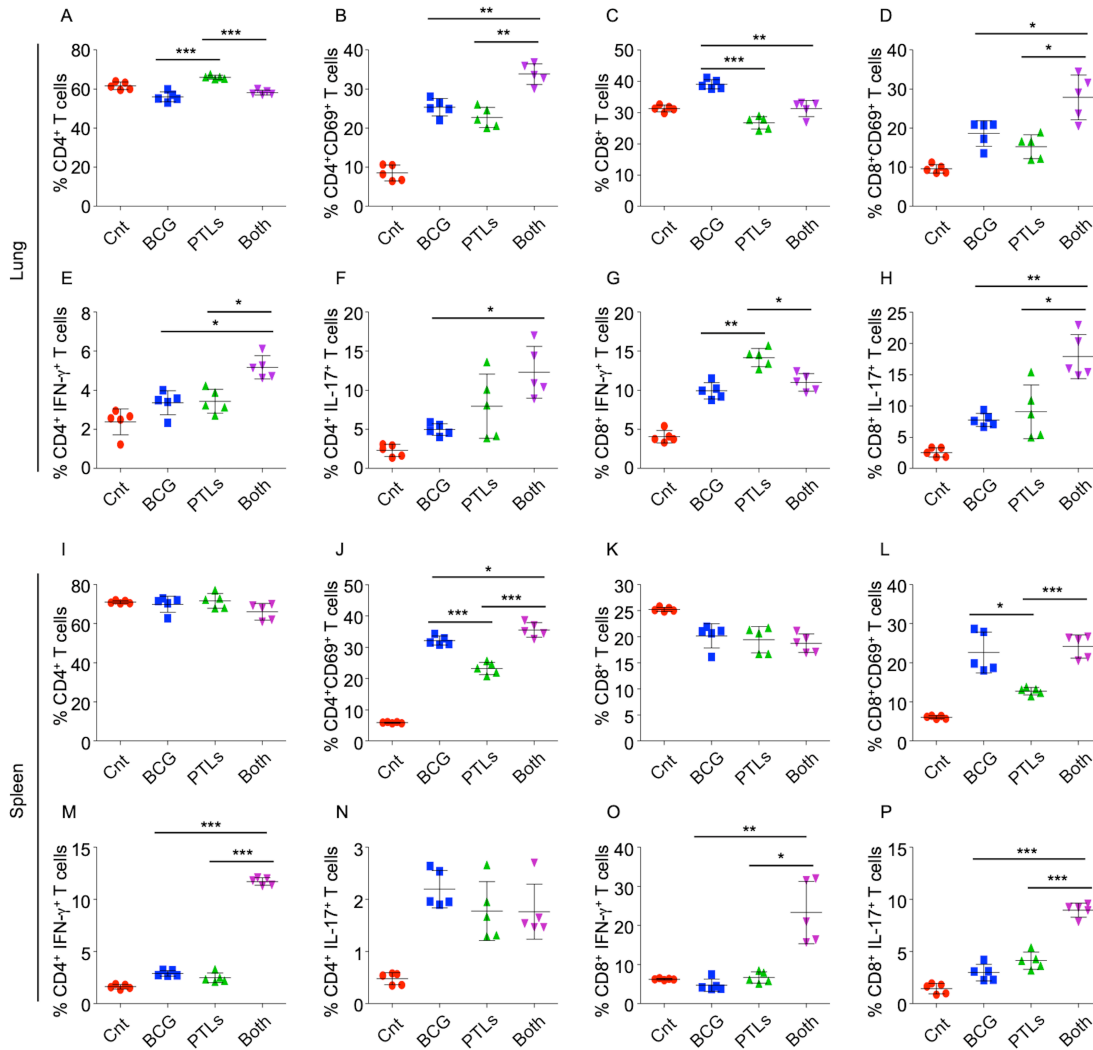

**Supplementary Figure 2: Pre-challenge immune responses in the lungs and the spleen of vaccinated mice.** (A-H) T lymphocytes were isolated from the lungs of all experimental groups and stained with 7AAD, anti-CD3, anti-CD4, anti-CD8, anti-CD69, anti-IFN- $\gamma$  and anti-IL-17 antibodies. Percentage of CD4<sup>+</sup> T cells (A), CD4<sup>+</sup>CD69<sup>+</sup> T cells (B), CD8<sup>+</sup> T cells (C) and CD8<sup>+</sup>CD69<sup>+</sup> T cells (D) in the lungs of unvaccinated (Cnt) and vaccinated animals. (E-H) Expression of IFN- $\gamma$  and IL-17 on CD4<sup>+</sup> and CD8<sup>+</sup> T cells in the lungs. (I-P) T lymphocytes isolated from the spleen of all experimental groups were stained with 7AAD, anti-CD3, anti-CD4, anti-CD8, anti-CD69, anti-IFN- $\gamma$  and anti-IL-17 antibodies. Percentage of CD4<sup>+</sup> T cells (I), CD4<sup>+</sup>CD69<sup>+</sup> T cells (J), CD8<sup>+</sup> T cells (K) and CD8<sup>+</sup>CD69<sup>+</sup> T cells (L) in the spleen of different groups. (M-P) Expression of IFN- $\gamma$  and IL-17 on CD4<sup>+</sup> and CD8<sup>+</sup> T cells in the spleen. One-way ANOVA followed by multiple tukey tests was performed for statistical analysis. Data is representative of two independent experiments (n=5 mice/group). \*p<0.05, \*\*p<0.005, \*\*\*p<0.0005.

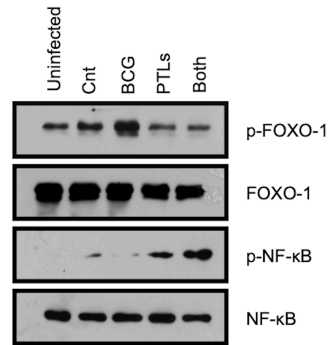

**Supplementary Figure 3: Enhanced NF-kB and FOXO-1 activation in the spleen of infected mice co-immunized with BCG-PTLs.** Cell lysates prepared from the splenocytes of infected mice from all the experimental groups were used to analyze the phosphorylation status of FOXO-1 and NF-kB by immunoblotting. Data is representative of two independent experiments.

**Supplementary Table 1: List of Peptides used in the study**

| <b>S. No.</b> | <b>Peptide Sequence</b>   | <b>Position</b> | <b>Protein name</b> | <b>Rv number</b> |
|---------------|---------------------------|-----------------|---------------------|------------------|
| P1            | AWGRRMLIGTAAAVVLPG        | 10aa - 27aa     | Ag85B               | Rv1886c          |
| P2            | TAAAVVLPGLVGLAGGAA        | 19aa - 36aa     | Ag85B               | Rv1886c          |
| P3            | WDINTPAFEWYYQSGLSI        | 91aa - 108aa    | Ag85B               | Rv1886c          |
| P4            | LDEGKQSLTKLAAAW           | 29aa - 43aa     | ESAT6               | Rv3875           |
| P5            | KQSLTKLAAAWGGSG           | 33aa - 47aa     | ESAT6               | Rv3875           |
| P6            | TKLAAAWGGSGSEAY           | 37aa - 51aa     | ESAT6               | Rv3875           |
| P7            | LARTISEAGQAMASTEGRVTGMFA  | 72aa - 95aa     | ESAT6               | Rv3875           |
| P8            | AVAASNNPELTTLTAALSGQLNPQV | 61aa-85aa       | Mpt70               | Rv2875           |
| P9            | ALSGQLNPQVNLVDLNSGQYTVFA  | 76aa-100aa      | Mpt70               | Rv2875           |
| P10           | FSKLPASTIDELKTNSSLLTSILTY | 106aa-130aa     | Mpt70               | Rv2875           |
| P11           | GNADVVCGGVSTANATVYMIDSVLM | 166aa-190aa     | Mpt70               | Rv2875           |
| P12           | TVYMIDSVLMPPA             | 181aa-193aa     | Mpt70               | Rv2875           |
| P13           | AVDAADKVLGYRNWL           | 278-292aa       | GlcB                | Rv1837           |
| P14           | KVLGYRNWLGLNKGD           | 284-298aa       | GlcB                | Rv1837           |

101 **Supplementary Table 2:** List of seven antigenic peptides used for further studies.  
 102 Experiments from A-C were repeated with the pool of seven peptides.

103

| Peptides | Sequences                |
|----------|--------------------------|
| P-1      | AWGRRLMIGTAAAVVLPG       |
| P-2      | TAAVVLPGLVGLAGGAA        |
| P-3      | WDINTPAFEWYYQSGLSI       |
| P-4      | KQSLTKLAAAWGGSG          |
| P-5      | TKLAAAWGGSGSEAY          |
| P-6      | LDEGKQSLTKLAAAW          |
| P-7      | LARTISEAGQAMASTEKNVTGMEA |

104
